# Supplementary material
Source: publisher site journal article supplement (https://www.dovepress.com/article/575834)
Supplement: Supplementary file 1 [file 575834%20Revised%20Manuscript_supplementary%20material_1.docx]

Supplementary Table 1

| **Supplementary Table 1. Baseline characteristics of the participants, all thyroid function** | | | | | | | | | |
| --- | --- | --- | --- | --- | --- | --- | --- | --- | --- |
|  | Overall  (N=2289) | Euthyroid  (N=2023) | Subclinical hypothyroidism  (N=101) | Hypothyroidism  (N=11) | Subclinical hyperthyroidism  (N=98) | Hyperthyroidism  (N=13) | Central hypothyroidism  (N=12) | Central hyperthyroidism  (N=31) | P-value |
| Age, mean (SD) | 78.0 (8.2) | 77.9 (8.2) | 79.4 (7.6) | 77.0 (7.0) | 79.8 (7.7) | 76.2 (13.8) | 77.1 (10.4) | 78.4 (9.3) | 0.2 |
| Gender-female | 1436 (63%) | 1253 (62%) | 67 (66%) | 7 (64%) | 70 (71%) | 11 (85%) | 7 (58%) | 21 (68%) | 0.48 |
| Type of dementia |  |  |  |  |  |  |  |  | 0.48 |
| Alzheimer’s disease | 1486 (65%) | 1312 (65%) | 69 (68%) | 5 (45%) | 64 (65%) | 11 (85%) | 8 (67%) | 17 (55%) |  |
| Vascular dementia | 301 (13%) | 260 (13%) | 16 (16%) | 1 (9.1%) | 15 (15%) | 1 (7.7%) | 2 (17%) | 6 (19%) |  |
| Lewy body dementia | 167 (7.3%) | 150 (7.4%) | 6 (5.9%) | 2 (18%) | 7 (7.1%) | 0 (0%) | 0 (0%) | 2 (6.5%) |  |
| others | 335 (15%) | 301 (15%) | 10 (9.9%) | 3 (27%) | 12 (12%) | 1 (7.7%) | 2 (17%) | 6 (19%) |  |
| CDR |  |  |  |  |  |  |  |  | 0.48 |
| 0.5 | 1173 (51%) | 1044 (52%) | 52 (51%) | 5 (45%) | 54 (55%) | 5 (38%) | 5 (5%) | 8 (26%) |  |
| 1 | 801 (35%) | 718 (35%) | 25 (25%) | 4 (36%) | 25 (26%) | 6 (46%) | 7 (58%) | 16 (52%) |  |
| 2 | 256 (11%) | 212 (10%) | 19 (19%) | 2 (18%) | 14 (14%) | 2 (15%) | 0 (0%) | 7 (23%) |  |
| 3 | 59 (2.6%) | 49 (2.4%) | 5 (5%) | 0 (0%) | 5 (5.1%) | 0 (0%) | 0 (0%) | 0 (0%) |  |

Hypothyroidism = TSH > 5.33 μIU/mL and Free T4 < 0.59 ng/dL; Hyperthyroidism = TSH < 0.38 μIU/mL and Free T4 > 1.43 ng/dL; Central hypothyroidism = TSH < 0.38 μIU/mL and Free T4 < 0.59 ng/dL; Central hyperthyroidism = TSH > 0.38 μIU/mL and Free T4 > 0.59 ng/dL

Supplementary Table 2

| **Supplementary Table 2. Baseline cognitive and behavioral status of the participants** | | | | | | | | | |
| --- | --- | --- | --- | --- | --- | --- | --- | --- | --- |
|  | Overall | Euthyroid | Subclinical hypothyroidism | Hypothyroidism | Subclinical hyperthyroidism | Hyperthyroidism | Central hypothyroidism | Central hyperthyroidism | P-value |
| CDRSOB |  |  |  |  |  |  |  |  | 0.10 |
| N | 2289 | 2023 | 101 | 11 | 98 | 13 | 12 | 31 |  |
| Mean (SD) | 4.7 (3.8) | 4.6 (3.8) | 5.5 (4.4) | 4.8 (3.3) | 5.3 (4.3) | 5.3 (4.0) | 4.0 (2.3) | 5.9 (3.7) |  |
| CASI |  |  |  |  |  |  |  |  | 013 |
| N | 2255 | 1995 | 99 | 11 | 96 | 12 | 11 | 31 |  |
| Mean (SD) | 51.2 (23.1) | 51.6 (23.2) | 48.2 (23.1) | 55.0 (15.8) | 48.0 (22.5) | 45.2 (23.4) | 49.8 (21.8) | 45.7 (20.8) |  |
| Presence of specific NPI symptom | | | | | | | | | |
| N | 2193 | 1934 | 95 | 10 | 99 | 13 | 8 | 34 |  |
| Delusion | 604 (28%) | 519 (27%) | 25 (26%) | 2 (20%) | 39 (39%) | 5 (38%) | 1 (13%) | 13 (38%) | 0.6 |
| Hallucination | 338 (15%) | 299 (15%) | 7 (7.4) | 3 (30%) | 15 (15%) | 3 (23%) | 1 (13%) | 10 (29%) | 0.6 |
| Agitation | 488 (22%) | 422 (22%) | 18 (19%) | 3 (30%) | 35 (35%) | 3 (23%) | 1 (13%) | 6 (18%) | 0.6 |
| Depression | 762 (35%) | 669 (35%) | 26 (27%) | 5 (50%) | 38 (38%) | 4 (31%) | 5 (63%) | 15 (44%) | 0.6 |
| Anxiety | 460 (21%) | 408 (21%) | 18 (19%) | 2 (20%) | 20 (20%) | 2 (15%) | 2 (25%) | 8 (24%) | >0.9 |
| Euphoria | 83 (3.8%) | 72 (3.7%) | 4 (4.2%) | 0 (0%) | 4 (4.0%) | 0 (0%) | 0 (0%) | 3 (8.8%) | 0.7 |
| Apathy | 541 (25%) | 485 (25%) | 22 (23%) | 2 (20%) | 20 (20%) | 4 (31%) | 2 (25%) | 6 (18%) | 0.9 |
| Disinhibition | 197 (9.0%) | 173 (8.9%) | 6 (6.3%) | 0 (0%) | 13 (13%) | 2 (15%) | 0 (0%) | 3 (8.8%) | 0.6 |
| Irritability | 630 (29%) | 555 (29%) | 22 (23%) | 2 (20%) | 34 (34%) | 7 (54%) | 2 (25%) | 8 (24%) | 0.6 |
| Aberrant motor behavior | 378 (17%) | 334 (17%) | 12 (13%) | 1 (10%) | 21 (21%) | 3 (23%) | 1 (13%) | 6 (18%) | 0.8 |
| Sleep | 923 (42%) | 808 (42%) | 44 (46%) | 6 (60%) | 45 (45%) | 3 (23%) | 2 (25%) | 15 (44%) | 0.5 |
| Appetite | 508 (23%) | 441 (23%) | 26 (27%) | 5 (50%) | 21 (21%) | 4 (31%) | 3 (38%) | 8 (24%) | 0.3 |
| Presence of Moderate to severe specific NPI symptom | | | | | | | | | |
| N | 2193 | 1934 | 95 | 10 | 99 | 13 | 8 | 34 |  |
| Delusion | 334 (15%) | 289 (15%) | 14 (15%) | 0 (0%) | 24 (24%) | 2 (15%) | 0 (0%) | 5 (15%) | 0.2 |
| Hallucination | 174 (7.9) | 148 (7.7) | 4 (4.2%) | 2 (20%) | 9 (9.1%) | 2 (15%) | 1 (13%) | 8 (24%) | 0.11 |
| Agitation | 239 (11%) | 210 (11%) | 7 (7.4%) | 1 (10%) | 13 (13%) | 2 (15%) | 1 (13%) | 5 (15%) | 0.7 |
| Depression | 375 (17%) | 329 (17%) | 16 (17%) | 2 (20%) | 16 (16%) | 1 (7.7%) | 3 (3.8%) | 8 (24%) | 0.6 |
| Anxiety | 226 (10%) | 195 (10%) | 11 (12%) | 1 (10%) | 11 (11%) | 1 (7.7%) | 1 (13%) | 6 (18%) | 0.7 |
| Euphoria | 22 (1.0%) | 18 (0.9%) | 2 (2.1%) | 0 (0%) | 1 (1.0%) | 0 (0%) | 0 (0%) | 1 (2.9%) | 0.4 |
| Apathy | 329 (15%) | 299 (15%) | 10 (11%) | 0 (0%) | 12 (12%) | 2 (15%) | 1 (13%) | 5 (15%) | 0.7 |
| Disinhibition | 96 (4.4%) | 89 (4.6%) | 1 (1.1%) | 0 (0%) | 4 (4.0%) | 1 (7.7%) | 0 (0%) | 1 (2.9%) | 0.6 |
| Irritability | 308 (14%) | 269 (14%) | 9 (9.5%) | 1 (10%) | 17 (17%) | 6 (46%) | 1 (13%) | 5 (15%) | 0.063 |
| Aberrant motor behavior | 220 (10%) | 199 (10%) | 5 (5.3%) | 1 (10%) | 7 (7.1%) | 3 (23%) | 1 (13%) | 4 (12%) | 0.3 |
| Sleep | 532 (24%) | 468 (24%) | 25 (26%) | 5 (50%) | 21 (21%) | 2 (15%) | 1 (13%) | 10 (29%) | 0.5 |
| Appetite | 302 (14%) | 264 (14%) | 15 (16%) | 2 (20%) | 13 (13%) | 2 (15%) | 2 (25%) | 4 (12%) | 0.8 |

Hypothyroidism = TSH > 5.33 μIU/mL and Free T4 < 0.59 ng/dL; Hyperthyroidism = TSH < 0.38 μIU/mL and Free T4 > 1.43 ng/dL; Central hypothyroidism = TSH < 0.38 μIU/mL and Free T4 < 0.59 ng/dL; Central hyperthyroidism = TSH > 0.38 μIU/mL and Free T4 > 0.59 ng/dL; CDRSOB: clinical dementia rating scale sum of boxes; N=number; SD: standard deviation; NPI: neuropsychiatric inventory
